# Supplementary material for: Changes in the liver transcriptome of farmed Atlantic salmon (Salmo salar) fed experimental diets based on terrestrial alternatives to fish meal and fish oil
Source: BMC Genomics. 2018 Nov 3;19:796. doi: 10.1186/s12864-018-5188-6 (PMC6215684; doi:10.1186/s12864-018-5188-6)
Supplement: Supplementary file 2 — Table S2. Complete list of microarray probes identified as diet-responsive. The results from the gene identification analysis, functional annotation, and microarray-based fold changes between diets are presented. For the qPCR-analyzed genes, data regarding the cDNA sequences utilized for primer design (e.g., the similarity between those corresponding to different paralogues) and qPCR-based fold changes between diets are also included. AA: amino acid; bp: base pair; RQ: relative quantity. (XLS 85 kb) [file 12864_2018_5188_MOESM2_ESM.xls]

## Sheet: Clean
Table S2. Complete list of microarray probes identified as diet-responsive. The results from the gene identification analysis, functional annotation, and microarray-based fold changes between diets are presented. For the qPCR-analyzed genes, data regarding the cDNA sequences utilized for primer design (e.g., the similarity between those corresponding to different paralogues) and qPCR-based fold c…
Microarray probe identifier	Gene identification			Gene ontology (GO) terms used for functional annotation	Fold change between diets (microarray log2 ratios)			Selected for qPCR analysis?		cDNA sequence for qPCR primer design						Fold change between diets (qPCR RQs)
	Best named BLASTx/BLASTn hit (species)	E-value	Identity (AA %)		ABP vs MAR	VEG vs MAR	VEG vs ABP			Accession number/s	Similarity between paralogues (bp %)	Similarity with array contig (bp %)	Similarity with array probe (bp %)	Paralogue most similar to microarray probe		ABP vs MAR	VEG vs MAR	VEG vs ABP
Carbohydrate metabolism
C035R008	Glucokinase (gck) [Salmo marmoratus]	3e-156	1	P: glycolytic process	-2.42718	-1.69492	1.43184	Yes		XM_014171080	N/A	0.95	0.97	N/A		-5.42547	-1.24086	4.37236
C185R084	Predicted: 6-phosphofructo-2-kinase/fructose-2,6-bisphosphatase isoform X2 (pfkfb4) [S. salar]	0	1	P:fructose metabolic process	-1.91608	-1.71847	1.11497	Yes		BT044025	N/A	0.99	1	N/A		-1.82492	-1.3079	1.39531
C113R060	Predicted: 6-phosphofructo-2-kinase/fructose-2,6-bisphosphatase isoform X2 (pfkfb4) [S. salar]	0	1	P:fructose metabolic process	-1.69085	-1.86393	-1.10238	Yes		BT044025	N/A	0.99	1	N/A
C043R025	Fructose-bisphosphate aldolase B [S. salar]	3e-65	0.94	P: glycolytic process	-1.42677	-1.85736	-1.30168
C169R002	Predicted: 6-phosphogluconate dehydrogenase, decarboxylating (6pgd) [S. salar]	0	1	P:pentose-phosphate shunt, oxidative branch	-1.25256	-2.02224	-1.61454	Yes		BT059099	N/A	1	1	N/A		-1.14578	-1.12733	1.01637
C039R032	Predicted: 6-phosphogluconate dehydrogenase, decarboxylating (6pgd) [S. salar]	0	1	P:pentose-phosphate shunt, oxidative branch	-1.02901	-1.79953	-1.74896	Yes		BT059099	N/A	1	1	N/A
C128R035	Predicted: glucose-6-phosphate 1-dehydrogenase-like (LOC106571947), transcript variant X3 [S. salar]*	0	0.99	P:pentose-phosphate shunt, oxidative branch	-1.13564	-1.52679	-1.34443
Lipid metabolism
C134R089	Predicted: diacylglycerol O-acyltransferase 2-like (LOC106567948) (dgat2b) [S. salar]*	0	0.89	P: triglyceride biosynthetic process	-1.5	-2.65957	-1.75131	Yes		BQ036283 & XM_014197366 (dgat2a)/EG878494 & XM_014137863 (dgat2b)	0.83	80%/93%	77%/100%	b		-2.25027	-1.80421	1.24723
C103R066	Predicted: diacylglycerol O-acyltransferase 2 (dgat2b) [S. salar]	0	0.82	P: triglyceride biosynthetic process	-1.26894	-2.02792	-1.59812	Yes		BQ036283 & XM_014197366 (dgat2a)/EG878494 & XM_014137863 (dgat2b)	0.83	91%/99%	97%/100%	b
C050R151	Predicted: acetyl-CoA carboxylase isoform X7 (acac) [S. salar]	6e-27	1	P:fatty acid biosynthetic process	-1.34199	-2.36711	-1.76388	Yes		DY706703 & XM_014196704	N/A	0.99	1	N/A		-1.33777	-1.05754	1.26498
C086R144	Fatty acid-binding protein, heart (fabp3) [S. salar]	3e-86	0.99	P: long-chain fatty acid transport	1.18653	-1.61499	-1.91608	Yes		NM_001123578 (fabp3a)/BT050105 (fabp3b)	0.92	92%/100%	-/100%	a/b		1.328	1.19138	-1.11467
C262R025	Predicted: isopentenyl-diphosphate Delta-isomerase 1 isoform X1 (idi1) [S. salar]	0	0.99	P:isoprenoid biosynthetic process	1.7177	1.8691	1.08815	Yes		DY710563 & XM_014157453	N/A	0.99	1	N/A		1.7309	2.94622	1.70213
C130R156	Predicted: insulin-induced gene 1 protein-like [S. salar]	4e-143	1	P: cholesterol biosynthetic process	2.37306	1.61035	-1.47363
C069R129	Fatty acyl-CoA reductase 1 [S. salar]	0	1	P:glycerophospholipid biosynthetic process	1.8916	1.36273	-1.38811
C078R087	Farnesyl pyrophosphate synthetase [S. salar]	0	1	P: cholesterol metabolic process	1.8207	1.83052	1.00539
C229R065	Predicted: squalene synthase isoform X2 (sqs) [S. salar]	0	1	P:cholesterol biosynthetic process	1.86154	1.73763	-1.07131	Yes		BT072164	N/A	0.99	1	N/A		2.49689	2.56061	1.02552
C025R006	Predicted: hydroxymethylglutaryl-CoA synthase, cytoplasmic-like (LOC106571543), transcript variant X4 [S. salar]*	0	0.99	P:cholesterol biosynthetic process	1.8025	1.42924	-1.26116
C067R143	Predicted: fatty acid hydroxylase domain-containing protein 2 [S. salar]	0	0.94	P: fatty acid biosynthetic process	-2.24758	-1.44531	1.55509
C089R080	Predicted: apolipoprotein B-100 precursor [S. salar]	0	1	P:lipid transport	-1.56152	-1.28699	1.21325
C190R063	Predicted: lipid phosphate phosphohydrolase 1 [S. salar]	0	1	P:lipid metabolic process	1.65878	2.16839	1.30722
C188R006	Predicted: long-chain-fatty-acid--CoA ligase ACSBG2 [S. salar]	0	1	P:long-chain fatty acid metabolic process	-1.71015	-2.45101	-1.43321
C104R105	Predicted: adiponectin precursor [S. salar]	4e-56	0.99	P:fatty acid beta-oxidation; P:glucose homeostasis	-1.48916	-1.95884	-1.3154
C085R162	CCAAT/enhancer-binding protein alpha [S. salar]	2e-84	0.95	P: lipid homeostasis; P:liver development	-1.16201	-1.793	-1.54301
C004R046	Predicted: fatty acid synthase [S. salar]	3e-54	1	P:fatty acid biosynthetic process	-0.790726	-1.26773	-1.60325
Nucleotide synthesis
C098R022	Adenylosuccinate synthetase isozyme 1 C (adssl1a) [S. salar]	0	1	P: 'de novo' AMP biosynthetic process	-1.88459	-2.58964	-1.37411	Yes		NM_001139706 (adssl1a)/DN163954 & GE623728 (adssl1b)	0.93	100%/95%	100%/91%	a		-2.8921	-2.38983	1.21017
C107R157	Predicted: adenylosuccinate synthetase isozyme 1 C-like (adssl1b) [S. salar]	6e-169	0.99	P: 'de novo' AMP biosynthetic process	-1.70483	-2.54559	-1.49317	Yes		NM_001139706 (adssl1a)/DN163954 & GE623728 (adssl1b)	0.93	96%/99%	95%/100%	b		N/A	N/A	N/A
C016R136	Predicted: CTP synthase 1-like [S. salar]	1e-53	0.82	P:'de novo' CTP biosynthetic process	-1.33469	-2.28291	-1.71045
C086R065	Predicted: kalirin-like isoform X6 [S. salar]	1.3e-33	0.98	F: guanyl-nucleotide exchange factor activity	-1.18058	1.72369	2.03496
Protein synthesis and degradation
C152R057	Ribosomal protein L18a [S. salar]	9e-123	1	P: translation	2.17724	1.63609	-1.33076
C027R084	Predicted: trypsin-2 [S. salar]	1e-172	0.99	P:proteolysis	1.9786	1.79284	-1.10362
C097R072	Trypsin precursor [S. salar]	3e-173	0.99	P:proteolysis	1.87872	1.18818	-1.58118
C172R121	60S ribosomal protein L7 [S. salar]	9e-170	0.97	P:cytoplasmic translation; P:regulation of cell cycle	-1.82308	-1.4418	1.26444
C005R140	60S acidic ribosomal protein P2 [S. salar]	6e-68	1	P:translational elongation	1.93388	2.3708	1.22593
Cell growth and proliferation
C168R030	Serine/threonine-protein kinase Sgk2 (sgk2a) [S. salar]	0	1	P:regulation of cell growth; P:regulation of cell proliferation	-1.85048	-1.05702	1.7508	Yes		NM_001139943 (sgk2a)/BT059352 (sgk2b)	0.92	100%/92%	100%/86%	a		-1.93014	1.59143	3.07168
C050R117	Serine/threonine-protein kinase Sgk2 (sgk2b) [S. salar]	0	1	P:regulation of cell growth; P:regulation of cell proliferation	-1.80538	-1.24833	1.44631	Yes		NM_001139943 (sgk2a)/BT059352 (sgk2b)	0.92	92%/100%	89%/100%	b		-1.58373	1.09857	1.73984
C231R170	Predicted: serine protease HTRA1B isoform X1 (htra1b) [S. salar]	2e-171	0.97	P:regulation of cell growth	-1.84638	-2.17108	-1.17589	Yes		NM_001141717 (htra1a)/EG831192 (htra1b)	0.91	91%/99%	48%/100%	b		-1.68254	-3.08183	-1.83165
C265R134	Predicted: serine protease HTRA1B isoform X1 (htra1b) [S. salar]	0	0.99	P:regulation of cell growth	-1.98807	-2.12359	-1.06816	Yes		NM_001141717 (htra1a)/EG831192 (htra1b)	0.91	89%/95%	93%/100%	b
C170R142	Predicted: serine protease HTRA1B isoform X1 (htra1b) [S. salar]	2e-171	0.97	P:regulation of cell growth	-1.61077	-1.84965	-1.1483	Yes		NM_001141717 (htra1a)/EG831192 (htra1b)	0.91	91%/99%	45%/100%	b
C035R053	Predicted: BicC family RNA binding protein 1 (bicc1), transcript variant X7 [S. salar]*	0	0.99	P: multicellular organism development	-1.41962	-1.58488	-1.11642
C064R045	Predicted: PERQ amino acid-rich with GYF domain-containing protein 1-like [S. salar]	2e-49	0.98	P: insulin-like growth factor receptor signaling pathway	1.8061	1.08589	-1.66324
C120R149	Predicted: protein regulator of cytokinesis 1-like isoform X1 [S. salar]	3e-21	0.98	P: positive regulation of cell proliferation	1.9839	1.54971	-1.28021
C087R056	Pre-mRNA-splicing factor syf2 [S. salar]	6e-149	1	P: positive regulation of cell proliferation	2.84	3.605	1.26938
C240R016	Predicted: cbp/p300-interacting transactivator 2-like [S. salar]	3e-49	0.99	P:liver development; P:cell proliferation	-1.7507	-1.4497	1.20769
Autophagy and apoptosis
C241R134	Predicted: serine/threonine-protein kinase ULK4 [Esox lucius]	7e-161	0.89	P:regulation of p38MAPK cascade	1.16949	-1.76991	-2.06996
C100R113	Growth arrest and DNA-damage-inducible protein GADD45 beta (gadd45ba) [Oncorhynchus mykiss]	1e-107	1	P: positive regulation of apoptotic process	1.9205	1.31073	-1.46523	Yes		BT047350 (gadd45ba)/EG900267 & XM_014216042 (gadd45bb)	0.84	96%/83%	100%/89%	a		1.49441	-2.24561	-3.35585
C263R103	Predicted: G0/G1 switch protein 2-like [S. salar]	2e-61	1	P:positive regulation of extrinsic apoptotic signaling pathway	-1.75747	-1.48994	1.17966
Antibacterial
C159R112	Leukocyte cell-derived chemotaxin 2 precursor (lect2) [Salmo salar]	3e-102	0.99	P:response to bacterium	-3.04785	-1.83486	1.6611	Yes		BT059281 (lect2a)/DV106130 (lect2b)	0.88	98%/88%	100%/-	a/b		-1.15948	1.13561	1.31671
C134R121	Leukocyte cell-derived chemotaxin 2 precursor (lect2a) [S. salar]	1e-101	0.99	P:response to bacterium	-2.26244	-1.89681	1.19272	Yes		BT059281 (lect2a)/DV106130 (lect2b)	0.88	98%/88%	100%/80%	a
C164R142	Leukocyte cell-derived chemotaxin 2 precursor (lect2a) [S. salar]	7e-103	0.99	P:response to bacterium	-1.90295	-1.27257	1.49537	Yes		BT059281 (lect2a)/DV106130 (lect2b)	0.88	98%/88%	100%/83%	a
C198R010	Hepcidin-1 precursor [S. salar]	6e-47	1	P: defense response to bacterium	-1.90585	-1.49602	1.27401
C201R127	Predicted: liver-expressed antimicrobial peptide 2-like [S. salar]	8e-44	1	P:defense response to bacterium	-1.36995	-2.08943	-1.52533
C150R092	Immunoglobulin delta heavy chain constant region (igd) [S. salar]	0	0.88	P:defense response to bacterium	1.5994	-1.17426	-1.87793	Yes		AF141606 & GU129140	N/A	0.93	1	N/A		1.69759	1.30586	-1.29997
C061R085	Ig mu chain C region membrane-bound form (igmb) [S. salar]	0	1	P: antibacterial humoral response	1.20957	-1.33712	-1.61734	Yes		BT058702 (igma)/BT059185 (igmb)	0.96	96%/100%	98%/100%	b		2.30887	-1.00636	-2.32356
C205R051	Ig mu chain C region membrane-bound form (igmb) [S. salar]	0	0.79	P: antibacterial humoral response	1.15799	-1.301	-1.50648	Yes		BT058702 (igma)/BT059185 (igmb)	0.96	97%/96%	100%/97%	a		1.4418	1.24202	-1.16034
C075R137	Ig mu chain C region membrane-bound form (igm) [S. salar]	0	0.79	P: antibacterial humoral response	1.2102	-1.2616	-1.52672	Yes		BT058702 (igma)/BT059185 (igmb)	0.96	97%/96%	100%/100%	a/b		N/A	N/A	N/A
Antiviral
C236R043	Interferon-induced GTP-binding protein Mx (mxb) [S. salar]	0	0.99	P: immune system process, P: response to virus	1.36971	2.0813	1.51953	Yes		U66475 (mxa)/BT044881 (mxb)	0.89	89%/99%	46%/100%	b		-1.23001	2.07661	2.55425
C055R128	Interferon-induced protein with tetratricopeptide repeats 5 (ifit5) [S. salar]	0	0.99	P: immune system process, P: response to virus	-1.4679	1.27744	1.8751	Yes		BT046021	N/A	0.99	1	N/A		-1.93519	1.68978	3.27005
Other immune-related
C071R161	Predicted: alpha-1-acid glycoprotein 1-like [Poecilia latipinna]	1.6e-11	0.4	P: regulation of immune system process	-2.18484	-1.39716	1.56374
C097R069	MHC class I heavy chain (mhcI) [Salmo trutta]	0	0.89	P: antigen processing and presentation	1.09467	1.84644	1.68675	Yes		AF504022	N/A	0.93	-	N/A		1.15381	4.15803	3.60372
C027R162	MHC class I heavy chain (mhcI) [Salmo trutta]	6e-134	1	P: antigen processing and presentation	-1.26499	-1.64063	-1.29695	Yes		AF504022	N/A	0.87	0.84	N/A
C211R164	MHC class I (mhcI) [S. salar]	2e-132	0.95	P: antigen processing and presentation	-1.09193	1.72922	1.8882	Yes		AF504022	N/A	0.98	0.87	N/A
C243R111	MHC class I heavy chain (mhcI) [Salmo trutta]	4e-133	1	P: antigen processing and presentation	-1.27114	1.48774	1.8911	Yes		AF504022	N/A	0.78	0.9	N/A
C219R002	Predicted: glucosidase 2 subunit beta-like [S. salar]	0	1	P: innate immune response	-1.18859	-1.80782	-1.52098
C249R068	Immunoglobulin light chain precursor [S. salar]	5e-115	0.92	P: innate immune response	-1.01449	-1.76632	-1.7411
C238R071	Predicted: C-C motif chemokine 13-like [S. salar]*	3e-77	0.9	P: chemotaxis; P: Inflammatory response	1.03195	1.82387	1.7674
C012R162	Predicted: dedicator of cytokinesis protein 11 isoform X2 [S. salar]	4e-61	0.91	P: B cell homeostasis	1.8712	1.7596	-1.06345
C121R056	Predicted: TSC22 domain family protein 3-like isoform X2 [S. salar]	2e-17	0.79	P: negative regulation of activation-induced cell death of T cells	1.757	1.21873	-1.44168
C255R144	Ubiquitin [Salmo salar]	7e-108	1	P: innate immune response	-1.35062	1.35273	1.827
C219R041	Predicted: peroxisomal membrane protein 2 [S. salar]	7e-153	1	P:response to type I interferon	-1.40335	1.29224	1.8135
C050R077	Predicted: probable E3 ubiquitin-protein ligase HERC6 [S. salar]	0	0.92	P:protein ubiquitination	-1.06299	1.83671	1.9524
Oxidative-reduction process
C163R079	Predicted: bifunctional methylenetetrahydrofolate dehydrogenase/cyclohydrolase, mitochondrial-like [S. salar]	0	0.99	P:folic acid metabolic process; P:oxidation-reduction process	-1.64718	1.24089	2.044
C140R113	Predicted: bifunctional methylenetetrahydrofolate dehydrogenase/cyclohydrolase, mitochondrial-like [S. salar]	0	0.99	P:folic acid-containing compound biosynthetic process; P:oxidation-reduction process	-1.55885	1.19706	1.8661
C060R108	Cytochrome c oxidase subunit II (mtco2) [Oncorhynchus masou masou]	1e-74	0.63	P:aerobic respiration	1.6602	-1.03931	-1.72563	Yes		BT044012 (mtco2a)/DW556807 (mtco2b)	0.96	78%/80%	83%/85%	a/b		N/A	N/A	N/A
C188R069	Cytochrome oxidase subunit I (mtco1) [Oncorhynchus masou masou]	0	0.94	P:aerobic respiration	1.25386	-1.3776	-1.72741	Yes		BT044032	N/A	0.88	-	N/A		1.20162	1.10745	-1.08514
C110R041	Predicted: glycine dehydrogenase (decarboxylating), mitochondrial-like [S. salar]	1e-12	1	P:glycine catabolic process; P:oxidation-reduction process	1.9903	1.42158	-1.40007
C177R075	Predicted: 4-hydroxyphenylpyruvate dioxygenase-like protein [S. salar]	0	0.99	P:tyrosine catabolic process; P:oxidation-reduction process	1.7749	1.52348	-1.16504
C033R147	Predicted: 1,25-dihydroxyvitamin D(3) 24-hydroxylase, mitochondrial-like [S. salar]	0	1	P:vitamin D catabolic process; P:oxidation-reduction process	1.904	1.84038	-1.03455
C202R025	Predicted: glutathione S-transferase theta-2B [S. salar]	6e-174	1	P:glutathione metabolic process; P:oxidation-reduction process	-1.93461	-1.19831	1.61454
C223R087	Predicted: cytochrome c oxidase subunit 7A-related protein, mitochondrial [S. salar]	1e-73	1	P:oxidation-reduction process	-1.47606	-1.89251	-1.28209
C079R035	Predicted: saccharopine dehydrogenase-like oxidoreductase [S. salar]	0	1	P:platelet degranulation P:oxidation-reduction process	-1.06797	-1.62734	-1.52375
C161R028	Cytochrome P450 1A1 [S. salar]	0	1	P:steroid metabolic process; P:oxidation-reduction process	-1.58077	-1.86025	-1.1768
C013R125	Predicted: phospholipid hydroperoxide glutathione peroxidase, mitochondrial-like isoform X2 [S. salar]	1e-142	0.99	P:response to oxidative stress; P:oxidation-reduction process	1.16111	-1.5831	-1.83824
Miscellaneous and unknown
C197R085	Predicted: uncharacterized protein LOC106589901 isoform X1 [S. salar]	2e-36	0.97	N/A	-2.31803	-1.83722	1.26171
C117R065	Predicted: tripartite motif-containing protein 16-like protein [S. salar]	9e-105	1	F:protein binding; F:zinc ion binding	-1.79469	-1.51454	1.18499
C246R060	Predicted: trace amine-associated receptor 13c-like [S. salar]	1e-82	0.91	P:sensory perception of chemical stimulus	-1.58983	-1.45372	1.09363
C047R086	Reticulon 3 [S. salar]	2e-124	0.89	C:endoplasmic reticulum membrane	-1.89789	-1.23456	1.53741
C170R106	Predicted: cysteine desulfurase, mitochondrial [S. salar]	0	1	P:cysteine metabolic process	-1.80213	-1.2079	1.492
C224R157	Predicted: membrane-spanning 4-domains subfamily A member 12-like [S. salar]	6e-176	0.99	C:integral component of membrane	-2.56279	-1.0087	2.54096
C031R147	Unknown	N/A	N/A	N/A	-2.73598	1.18952	3.2541
C128R041	Transposase [S. salar]	4e-109	0.62	P:transposition, DNA-mediated	-1.4357	1.71639	2.4642
C012R022	Predicted: uncharacterized protein LOC106563597 [S. salar]	5e-116	0.99	N/A	-1.09638	1.34339	1.4729
C086R032	Transposase [S. salar]	4e-109	0.62	P:transposition, DNA-mediated	-1.17517	1.57393	1.8496
C221R141	Predicted: barrier-to-autointegration factor-like (LOC106594559) [S. salar]*	1e-65	1	F: DNA binding	-1.18828	1.59923	1.9003
C239R061	Salmo salar clone ssal-rgf-511-174 unknown large open reading frame mRNA, novel cds [S. salar]*	0	1	N/A	-1.19758	1.61091	1.9292
C253R012	Predicted: Salmo salar uncharacterized LOC106612462 [S. salar]	2e-176	0.86	N/A	-1.77368	1.12681	1.9984
C049R143	Predicted: alcohol dehydrogenase 1-like [S. salar]	0	1	P:ethanol oxidation; P:receptor-mediated endocytosis; P:cellular response to xenobiotic stimulus	2.5604	2.2	-1.14492
C042R095	GTPase IMAP family member 7 [S. salar]	2e-58	0.55	F:GTP binding	1.3492	1.28978	-1.04608
C145R119	Predicted: trichohyalin-like [S. salar]	0	0.97	P: keratinization	1.7234	1.60117	-1.07633
C054R118	Predicted: cysteine sulfinic acid decarboxylase-like [S. salar]	0	0.99	P:taurine biosynthetic process	1.815	1.74434	-1.02874
C266R056	Predicted: 7SK snRNA methylphosphate capping enzyme-like [S. salar]	4e-118	1	P:negative regulation of transcription from RNA polymerase II promoter; P:RNA methylation	1.9865	1.92219	-1.03347
C060R160	Predicted: nuclear factor 1 X-type-like (LOC106601192), transcript variant X15 [S. salar]*	0	0.94	P: DNA replication; P: transcription, DNA-templated	2.1113	1.49084	-1.41618
C188R156	Unknown	N/A	N/A	N/A	2.1596	1.51861	-1.42208
C002R046	Predicted: uncharacterized LOC106594324 [S. salar]*	0	0.97	N/A	1.805	1.36805	-1.31939
C088R107	15.5 kDa protein [S. salar]	0	0.98	C:integral component of membrane	1.7553	1.36616	-1.28487
C256R064	Predicted: trichohyalin-like [S. salar]	0	0.97	P: keratinization	1.6252	1.45549	-1.16473
C134R140	Predicted: ankyrin-1-like isoform X16 [S. salar]	2e-170	0.99	F:molecular_function; P:biological_process	1.59	1.45095	-1.09581
C088R053	Predicted: GATA zinc finger domain-containing protein 10-like [S. salar]	5e-19	1	P: regulation of transcription, DNA-templated	1.7244	1.44468	-1.19365
C155R124	Predicted: trichohyalin-like, partial [S. salar]	6e-82	0.95	P: keratinization	1.8892	1.78966	1.00026
C248R119	Predicted: trichohyalin-like [S. salar]	0	0.97	P: keratinization	1.62521	1.51394	1.11613
C124R060	Predicted: protein RD3-like [S. salar]	4e-59	1	P:retina development in camera-type eye	1.4911	1.87742	1.25908
C079R142	Predicted: uncharacterized protein LOC106578604 [S. salar]	8e-84	1	N/A	-1.01709	-2.30894	-2.27015
C026R029	Predicted: kelch-like family member 24 (klhl24) [Esox lucius]*	6e-45	0.71	P: protein ubiquitination	-1.17314	-1.89803	-1.6179
C215R138	Betaine--homocysteine S-methyltransferase 1 [S. salar]	0	0.98	P:type B pancreatic cell development; P:amino-acid betaine catabolic process	-1.31791	-1.9177	-1.45511
C058R109	Cytosolic sulfotransferase 2 [S. salar]	0	1	P:xenobiotic metabolic process; P:estrogen metabolic process	-1.30168	-1.77799	-1.36592
C109R104	Hemoglobin subunit alpha [S. salar]	3e-72	0.81	P:response to hypoxia; P:oxygen transport	-1.32409	-1.76159	-1.33041
C105R004	Adipocyte plasma membrane-associated protein [S. salar]	0	0.98	P:biosynthetic process	-1.27357	-1.81268	-1.42331
C050R139	Unnamed protein product [Oncorhynchus mykiss]	3e-06	0.97	N/A	-1.30631	-1.6888	-1.2928
C206R070	Predicted: P2Y purinoceptor 8-like [S. salar]	0	1	P:blood coagulation; P:thrombin receptor signaling pathway	-1.72354	-2.16732	-1.25745
C238R090	Succinyl-CoA ligase subunit alpha, mitochondrial precursor, partial [Salmo salar]	0	0.98	F:poly(A) RNA binding	-1.71703	-1.07484	1.59743
C205R072	Cytosolic sulfotransferase 2 [S. salar]	0	1	P:xenobiotic metabolic process; P:estrogen metabolic process	-1.48568	-1.79642	-1.20916
C128R088	Predicted: zinc finger MYM-type protein 1-like [S. salar]	2e-12	0.88	F: nucleic acid binding; F: metal ion binding	-1.53754	-1.88508	-1.22603
C152R129	Predicted: spatacsin isoform X3 [S. salar]	9e-53	0.95	C:integral component of membrane	1.35684	-1.29381	-1.75562
